# Supplementary material for: Use of Conventional and Innovative Technologies for the Production of Food Grade Hop Extracts: Focus on Bioactive Compounds and Antioxidant Activity
Source: MDPI journal article supplement (doi:10.3390/plants11010041), 2021-12-23
Supplement: s1 [file s1]

**Table S3.** Predictions values on variable t:

| Observation    | t     | Pred(t) | Residual |
|----------------|-------|---------|----------|
| HPUS 15'       | 15,0  | 18,3    | -3,336   |
| HPUS 15'       | 15,0  | 13,6    | 1,383    |
| HPUS 30'       | 30,0  | 19,3    | 10,714   |
| HPUS 30'       | 30,0  | 11,2    | 18,848   |
| HPUS 60'       | 60,0  | 65,7    | -5,717   |
| HPUS 60'       | 60,0  | 84,7    | -24,703  |
| HPUS 120'      | 120,0 | 98,6    | 21,411   |
| HPUS 120'      | 120,0 | 107,2   | 12,796   |
| US 15'         | 15,0  | 5,3     | 9,740    |
| US 15'         | 15,0  | 10,1    | 4,863    |
| US 30'         | 30,0  | 26,7    | 3,325    |
| US 30'         | 30,0  | 33,9    | -3,895   |
| US 60'         | 60,0  | 74,0    | -14,038  |
| US 60'         | 60,0  | 75,3    | -15,256  |
| US 120'        | 120,0 | 105,6   | 14,402   |
| US 120'        | 120,0 | 104,1   | 15,941   |
| CONV 60°C 15'  | 15,0  | 16,6    | -1,597   |
| CONV 60°C 15'  | 15,0  | 12,3    | 2,716    |
| CONV 60°C 30'  | 30,0  | 36,6    | -6,604   |
| CONV 60°C 30'  | 30,0  | 38,9    | -8,869   |
| CONV 60°C 60'  | 60,0  | 98,1    | -38,058  |
| CONV 60°C 60'  | 60,0  | 101,7   | -41,743  |
| CONV 60°C 120' | 120,0 | 105,5   | 14,539   |
| CONV 60°C 120' | 120,0 | 111,7   | 8,322    |
| CONV 25°C 15'  | 15,0  | 12,5    | 2,526    |
| CONV 25°C 15'  | 15,0  | 10,0    | 5,020    |
| CONV 25°C 30'  | 30,0  | 28,9    | 1,120    |
| CONV 25°C 30'  | 30,0  | 35,1    | -5,051   |
| CONV 25°C 60   | 60,0  | 67,6    | -7,641   |
| CONV 25°C 60   | 60,0  | 78,6    | -18,638  |
| CONV 25°C 120' | 120,0 | 77,2    | 42,793   |
| CONV 25°C 120' | 120,0 | 80,7    | 39,338   |
| HHP            | 5,0   | 21,9    | -16,904  |
| HHP            | 5,0   | 22,7    | -17,748  |
