# Supplementary material for: Use of Conventional and Innovative Technologies for the Production of Food Grade Hop Extracts: Focus on Bioactive Compounds and Antioxidant Activity
Source: MDPI journal article supplement (doi:10.3390/plants11010041), 2021-12-23
Supplement: s1 [file s1]

**Table S1.** Multifactorial ANOVA of the individual and interactive effects of extraction temperature (T) and time (t) for both conventional extractions (25°C; 60°C), and extraction method (EM) and time (t) for both ultrasound assisted extractions (US; HPUS), on the functional properties of hop extracts.

|   |      |        | GA         | pOH-B      | SyrA      | EllA      | ProCA     | Cat       | EGC        | ChlA      | ChicA     | CafA       | FerA      | pCuA       | Rut       | XAN        | TOT       |
|---|------|--------|------------|------------|-----------|-----------|-----------|-----------|------------|-----------|-----------|------------|-----------|------------|-----------|------------|-----------|
| F | CONV | T      | n.d.       | 100.91***  | 209.38*** | 51.374*** | 23.366**  | 116.64*** | 197.701*** | 1776.1*** | n.d.      | 197.263*** | 39.196*** | 408.235*** | 107.08*** | 142.374*** | 495.33*** |
| F |      | t      | n.d.       | 1575.49*** | 27.01***  | 91.474*** | n.s.      | 529.23*** | 6.747*     | 806.4***  | n.d.      | 75.291***  | 10.7641** | 33.779***  | 82.40***  | n.s.       | 17.82***  |
| F |      | T x t  | n.d.       | 12.5**     | n.s.      | n.s.      | 24.375*** | n.s.      | 16.517***  | 657.5***  | n.d.      | 13.5148**  | 6.137*    | 23.1756*** | 7.78**    | 8.345**    | n.s.      |
| F | UAE  | EM     | 49.94***   | 94.95***   | 26.727*** | 40.39***  | n.s.      | n.s.      | 21.38**    | 9.15*     | 74.298*** | n.s.       | 12.167**  | 76.395***  | 6.62*     | 44.658***  | n.s.      |
| F |      | t      | 2868.68*** | 63.88***   | 10.043**  | 391.50*** | n.s.      | 398.18*** | 109.73***  | 43.78***  | 22.357*** | 43.531***  | 29.850*** | 71.341***  | 23.97***  | 10.087**   | 66.47***  |
| F |      | EM x t | 9.54**     | 5.25*      | 7.083*    | 11.31**   | n.s.      | 7.28*     | 9.75**     | 28.88***  | 22.357*** | 6.769*     | n.s.      | 11.851**   | 17.73***  | n.s.       | 4.31*     |

CONV: conventional extraction; UAE; ultrasound assisted extraction; GA: Gallic Acid; pOH-B: p-Hydroxybenzoic Acid; SyrA: Syringic Acid; EllA: Ellagic Acid; ProCA: Protocatechuic Acid; Cat: Catechin; EGC: Epigallocatechin; ChlA: Chlorogenic Acid; ChicA Chicoric Acid; CafA: Caffeic Acid; FerA: Ferulic Acid; pCuA: p-Coumaric Acid; Rut: Rutin; XAN: Xanthohumol; TOT: Total; n.d. not detected; n.s. not significant; \* $p < 0.05$ ; \*\* $p < 0.01$ ; \*\*\* $p < 0.001$ .
