# Supplementary material for: Use of Conventional and Innovative Technologies for the Production of Food Grade Hop Extracts: Focus on Bioactive Compounds and Antioxidant Activity
Source: MDPI journal article supplement (doi:10.3390/plants11010041), 2021-12-23
Supplement: s1 [file s1]

**Table S2.** Multifactorial ANOVA of the individual and interactive effects of extraction temperature (T) and time (t) for both conventional extractions (25°C; 60°C), and extraction method (EM) and time (t) for both ultrasound assisted extractions (US; HPUS), on the functional properties of hop extracts.

|   |      |        | TPC       | TFC        | TEAC      | IC <sub>50</sub> | Chl $\alpha$ | Chl $\beta$ | TCC       |
|---|------|--------|-----------|------------|-----------|------------------|--------------|-------------|-----------|
| F |      | T      | 727***    | 22835.1*** | 10.57*    | 1348.7***        | 1244.48***   | 656.265***  | 334.393** |
| F | CONV | t      | 10.0***   | 170.4***   | 217.75*** | 223.2***         | 71.92***     | 27.023***   | 6.455*    |
| F |      | T x t  | 15.3***   | 1458.1***  | 300.51*** | 157.6***         | 29.35**      | 13.678**    | n.s.      |
| F |      | EM     | 184.96*** | 39.92***   | 64.691*** | 30.972**         | 60.367***    | 76.2506***  | 80.233*** |
| F | UAE  | t      | 26.94***  | 5.25**     | 19.894*** | n.s.             | 10.562**     | n.s.        | 12.335**  |
| F |      | EM x t | n.s.      | 4.73**     | 3.404*    | n.s.             | 4.410*       | n.s.        | 5.694*    |

CONV: conventional extraction; UAE Ultrasound Assisted Extraction; n.s.: not significant; TPC: Total Polyphenol Content (mg GAE g<sup>-1</sup> dm); TFC: Total Flavonoids Content (mg QE g<sup>-1</sup> dm); TEAC: Trolox Equivalent Antioxidant Capacity ( $\mu$ mol g<sup>-1</sup> dm); antiradical capacity express as Inhibitory Capacity IC<sub>50</sub> (mg/ml); Chl  $\alpha$ : Chlorophyll  $\alpha$ ; Chl  $\beta$ : Chlorophyll  $\beta$  and TCC: Total Carotenoid Content (mg g dm<sup>-1</sup>). \* $p$  < 0,05; \*\* $p$  < 0,01; \*\*\* $p$  < 0,001.
